# Supplementary material for: Supraphysiologic estradiol is an independent predictor of low birth weight in full-term singletons born after fresh embryo transfer
Source: Oxford University Press journal article supplement (doi:10.1093/humrep/dex095), 2017-04-20
Supplement: dex095_suppl_figure1.pdf [file dex095_suppl_figure1.pdf]

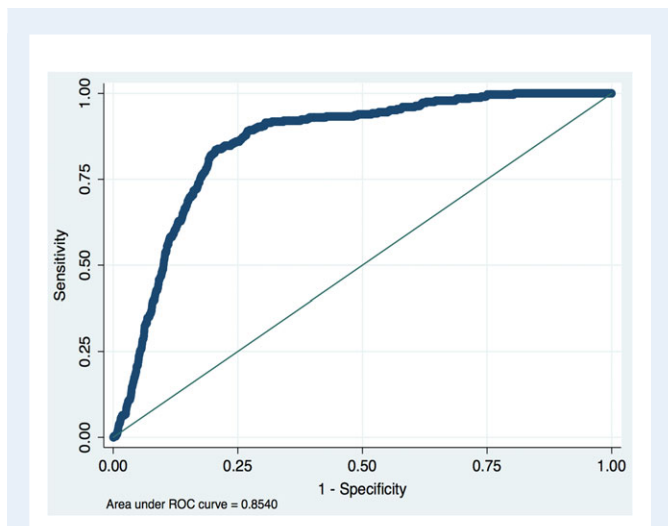

**Supplemental Figure S1** ROC curve highlighting the performance of  $E_2$  levels on the day of hCG trigger to predict term LBW. LBW, low birth weight; ROC, receiver operating characteristic;  $E_2$ , estradiol.
